# Supplementary material for: Factors associated with bronchiectasis in Korea: a national database study
Source: PubMed Central journal article supplement — Ann Transl Med. 2020 Nov;8(21):1350. doi: 10.21037/atm-20-4873 (PMC7723591; doi:10.21037/atm-20-4873), 2020-11
Supplement: atm-08-21-1350-supplementary.pdf [file atm-08-21-1350-supplementary.pdf]

## Supplementary

**Table S1** Comparison of symptoms, physical activity, perceived health, and quality of life between the groups

| Variable                                                   | Total (N=6,934)  | Subjects without bronchiectasis (n=5,978) | Subjects with bronchiectasis (n=52) | P value |
|------------------------------------------------------------|------------------|-------------------------------------------|-------------------------------------|---------|
| <b>Symptoms</b>                                            |                  |                                           |                                     |         |
| Cough                                                      | 5.0 (4.1–6.0)    | 4.9 (4.6–5.9)                             | 21.0 (10.0–39.1)                    | <0.001  |
| Sputum                                                     | 9.4 (7.9–11.0)   | 9.3 (7.9–10.9)                            | 24.2 (11.8–43.2)                    | 0.008   |
| Dyspnea                                                    | 0.9 (0.6–13.7)   | 0.9 (0.7–1.3)                             | 8.6 (2.0–30.5)                      | <0.001  |
| Limitation of physical activity due to respiratory disease | 5.2 (4.0–66.8)   | 4.8 (3.7–6.2)                             | 34.8 (14.2–63.2)                    | <0.001  |
| <b>Perceived health</b>                                    |                  |                                           |                                     |         |
| Good/very good                                             | 41.4 (39.8–43.1) | 41.5 (39.8–43.1)                          | 28.3 (15.0–47.1)                    | 0.061   |
| Not good/not bad                                           | 39.4 (37.7–41.1) | 39.4 (37.7–41.1)                          | 37.3 (23.3–53.9)                    |         |
| Bad/very bad                                               | 19.2 (18.1–20.3) | 19.1 (17.9–20.2)                          | 34.3 (21.3–50.2)                    |         |
| <b>EQ-5D component</b>                                     |                  |                                           |                                     |         |
| Mobility                                                   | 12.9 (12.0–13.8) | 12.8 (11.9–13.8)                          | 22.7 (13.0–36.6)                    | 0.040   |
| Self-care                                                  | 2.9 (2.5–3.3)    | 2.9 (2.5–3.3)                             | 3.2 (0.6–15.7)                      | 0.891   |
| Usual activity                                             | 8.1 (7.4–8.8)    | 7.9 (7.3–8.7)                             | 27.5 (15.8–43.4)                    | <0.001  |
| Pain/discomfort                                            | 29.8 (28.3–31.4) | 28.8 (27.2–30.5)                          | 44.2 (28.1–61.6)                    | 0.001   |
| Anxiety/depression                                         | 12.6 (11.7–13.6) | 12.5 (11.6–13.6)                          | 28.2 (16.2–44.3)                    | 0.004   |
| EQ-5D index                                                | 0.92 (0.92–0.93) | 0.93 (0.92–0.93)                          | 0.87 (0.82–0.93)                    | <0.001  |

Data are presented as weighted mean (95% confidence interval) or weighted percentage (95% CI). EQ-5D, EuroQoL five dimension; CI, confidence interval.
